# Supplementary material for: Accuracy of 18F-FDG PET/CT and CECT for primary staging and diagnosis of recurrent gastric cancer: A meta-analysis
Source: PubMed Central journal article supplement — Exp Ther Med. 2020 Dec 21;21(2):164. doi: 10.3892/etm.2020.9595 (PMC7792481; doi:10.3892/etm.2020.9595), 2020-12-21

Figure S1. Deeks' Funnel plot for publication bias. Diagnostic performance of  $^{18}\text{F}$ -fluorodeoxyglucose positron emission tomography/CT for lymph node metastasis. Number inside each of the circles indicate the study number. EES-Estimated Effect Size.

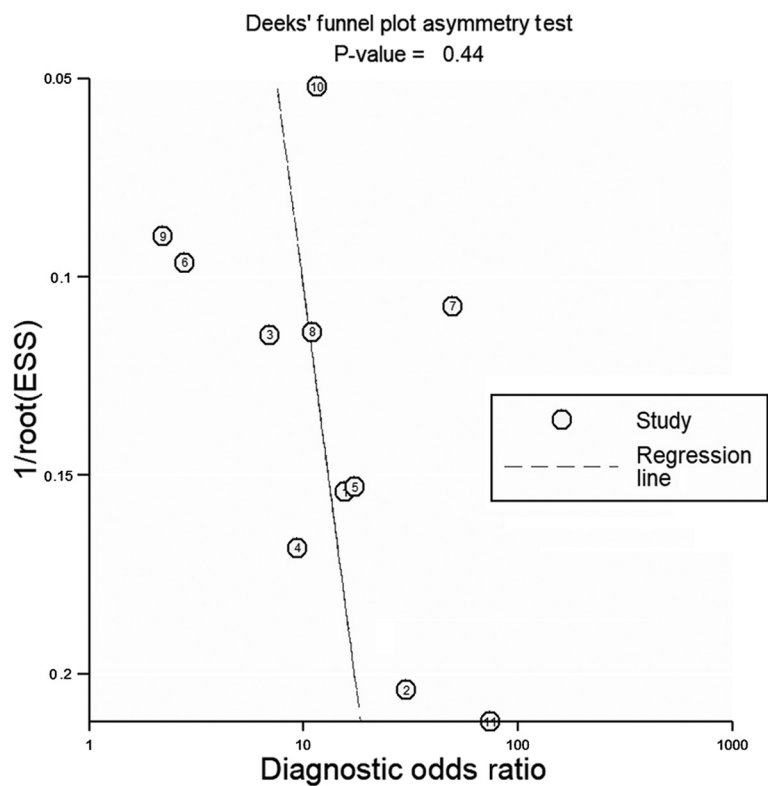

Figure S2. Deeks' Funnel plot for publication bias: Diagnostic performance of  $^{18}\text{F}$ -fluorodeoxyglucose positron emission tomography/CT for recurrent gastric cancer. Number inside each of the circles indicate the study number. EES- Estimated Effect Size.

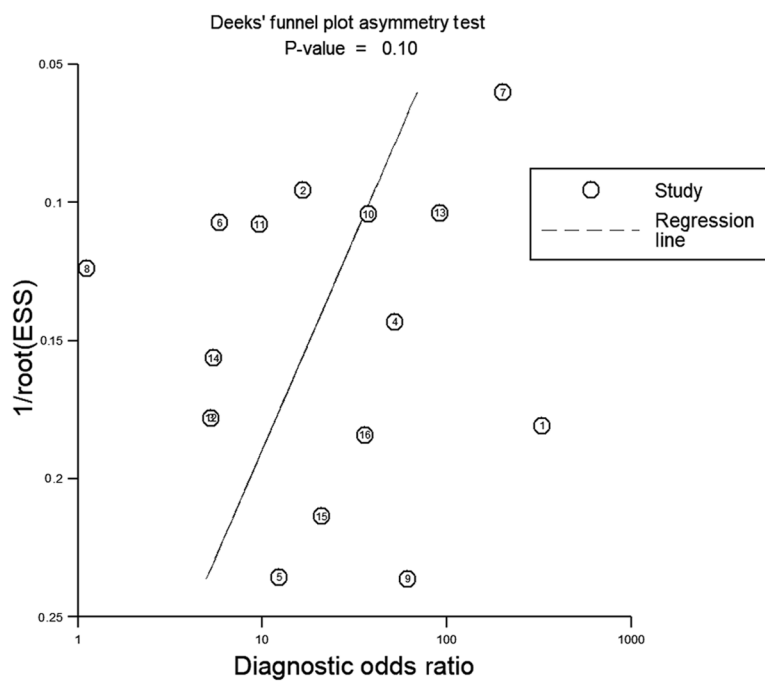

Figure S3. Deeks' Funnel plot for publication bias: Diagnostic performance of contrast-enhanced CT for lymph node metastasis. Number inside each of the circles indicate the study number. EES-Estimated Effect Size.

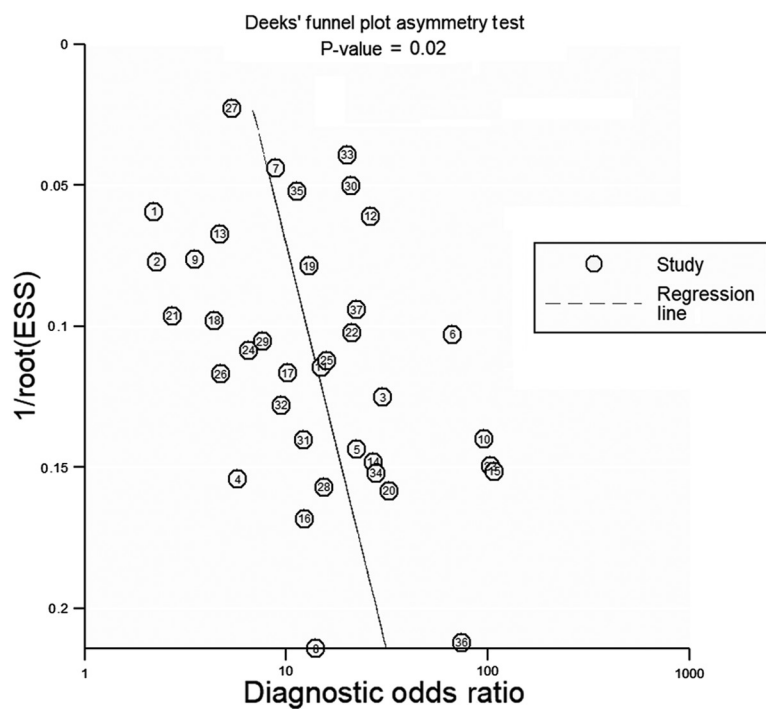

Supplement: Supplementary_Data.pdf [file Supplementary_Data.pdf]
